# Supplementary material
Source: PubMed Central journal article supplement (PMC263852)

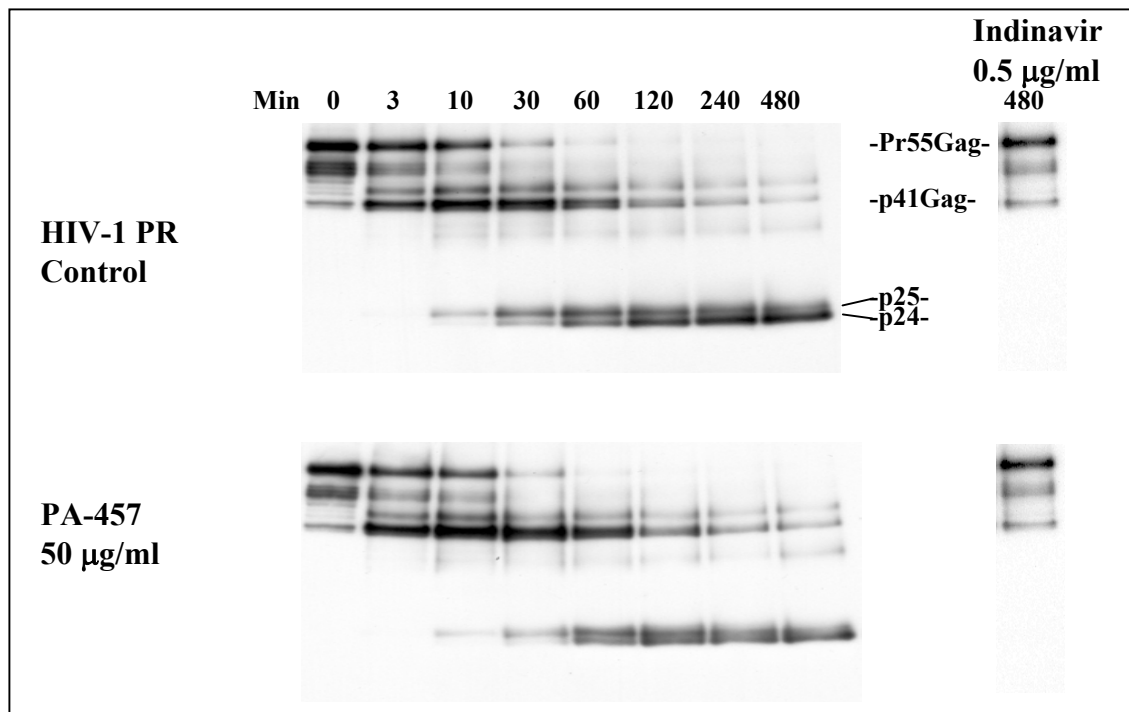

Supplement: pnas_100_23_13555__3.pdf [file pnas_100_23_13555__3.pdf]
